# Supplementary material for: Schiff-base coordination complexes with plutonium(iv) and cerium(iv)
Source: Royal Society of Chemistry journal article supplement (doi:10.1039/c8cc03571g), 2018-01-01
Supplement: c8cc03571g1.pdf [file c8cc03571g1.pdf]

*Electronic Supporting Information for:*

***Schiff-base coordination complexes with Pu(IV) and Ce(IV)***

Bonnie E. Klammer, Cory J. Windorff, Matthew L. Marsh, David S. Meeker, and Thomas E.  
Albrecht-Schmitt\*

Department of Chemistry and Biochemistry, Florida State University, 95 Chieftan Way,  
Tallahassee, Florida 32306, United States.

\*albrecht-schmitt@chem.fsu.edu

| <b>Table of Contents</b>      | <b>Page</b> |
|-------------------------------|-------------|
| Experimental Section .....    | S2–S4       |
| NMR Spectra.....              | S5–S6       |
| Absorbance Spectra.....       | S7          |
| Cyclic Voltammetry.....       | S8          |
| Crystallographic Details..... | S10–S13     |
| References.....               | S13         |

## Experimental

### General Considerations

**Caution!**  $^{239}\text{Pu}$  [ $t_{1/2} = 24,110(30)$  y] is a serious health threat, due to its radioactive decay, as well as that of its daughters. Hence, all studies with plutonium were conducted with appropriate controls for the safe handling and manipulation of radioactive materials, i.e. in a radiation laboratory equipped with a HEPA filtered hood. All free-flowing solids that contained plutonium were handled in negative-pressure gloveboxes or were covered in oil.

All operations were performed in an open atmosphere with no attempt to exclude air and moisture.  $^{239}\text{Pu}$  was MT-52 and obtained from Los Alamos National Laboratory as  $\text{PuO}_2$  and converted to  $\text{PuCl}_3 \cdot x\text{H}_2\text{O}$  by repeated dissolution in concentrated HCl.  $\text{CeCl}_3 \cdot 7\text{H}_2\text{O}$  (Sigma-Aldrich), 1,2-phenylenediamine (Sigma-Aldrich), 4-Diethylaminosalicylaldehyde (Sigma-Aldrich),  $\text{NEt}_3$  (Sigma-Aldrich), and  $\text{CDCl}_3$  (Sigma-Aldrich) were purchased from commercial sources and used as received.

UV/vis/NIR spectroscopic data were obtained from single crystals using a CRAIC Technologies UV/vis/NIR microspectrophotometer. Crystals were placed on quartz slides under Krytox oil and data were collected from 200 nm to 1400 nm.  $^1\text{H}$  and  $^{13}\text{C}\{^1\text{H}\}$  NMR spectra were recorded on a Bruker 600 MHz spectrometer operating at 600.1 and 150.9 MHz, respectively, at 298 K unless otherwise stated.  $^1\text{H}$  and  $^{13}\text{C}\{^1\text{H}\}$  NMR spectra were referenced internally to solvent resonances. Electrochemical data was recorded on a CH Instruments Model 600E Series potentiostat. A three-electrode configuration comprising a platinum disk working electrode (2 mm diameter), a platinum wire counter electrode, and silver wire pseudo-reference electrode were used in all experiments. Cyclic voltammetric scans were conducted in DCM with 0.1 M  $[\text{N}^i\text{Bu}_4][\text{PF}_6]$  electrolyte for characterization of the ligand species, cerium, and plutonium complexes. Melting point data was performed using open capillaries on a Mel-Temp using an uncalibrated mercury thermometer. Elemental analyses for C, H, and N were carried out by Midwest Microlab, Indianapolis, IN. Single crystals selected for data collection were mounted on and optically aligned on a Bruker D8 Discover X-ray diffractometer, using a digital camera. Crystallographic data were collected at room temperature using a Mo-K $\alpha$  ( $\lambda = 0.71069$  Å) X-ray source and a graphite monochromator. The APEX III software<sup>1</sup> was used for the determination of the unit cells and data collection control. The raw data frames were

processed using SAINT<sup>2</sup> and SADABS.<sup>3</sup> Subsequent calculations were carried out using the OLEX2 program.<sup>4</sup> The structures were solved by olex2.solve and refined by full-matrix least-squares on F<sup>2</sup> techniques.

### Synthesis of *N,N'*-bis[(4, 4'-diethylamino)salicylidene]-1, 2-phenylenediamine (H<sub>2</sub>L)

H<sub>2</sub>L was synthesized in a manner similar to procedures utilized with other Schiff-base salen ligands molecules previously reported.<sup>5-9</sup> To a stirred solution of 1,2-phenylenediamine, o-C<sub>6</sub>H<sub>4</sub>(NH<sub>2</sub>)<sub>2</sub> (0.500 g, 4.62 mmol) in methanol (10 mL), 4-diethylamino-salicylaldehyde HC(O)C<sub>6</sub>H<sub>3</sub>,2-OH,4-NEt<sub>2</sub> (1.79 g, 9.25 mmol) in methanol (15 mL), was added and refluxed for 8 h. The mixture was cooled to room temperature and concentrated under vacuum. The crude product was washed with methanol and dried under vacuum, giving H<sub>2</sub>L as a fine yellow powder (1.17 g, 55%). <sup>1</sup>H NMR (CDCl<sub>3</sub>): δ 13.69 (s, 2H, O-*H*), 8.45 (s, 2H, *H*-C(Ar)=N), 7.22 (s, 4H, Ar-*H*), 7.15 (s, 2H, Ar-*H*), 6.26 (s, 2H, Ar-*H*), 6.24 (s, 2H, Ar-*H*), 3.40 (s, 8H, NCH<sub>2</sub>CH<sub>3</sub>), 1.21 (s, 12H, CH<sub>2</sub>CH<sub>3</sub>); <sup>13</sup>C{<sup>1</sup>H} NMR (CDCl<sub>3</sub>): δ 164.61 (Ar-C), 160.90 (Ar-C), 151.91 (Ar-C), 142.58 (Ar-C), 133.81 (Ar-C), 126.17 (Ar-C), 119.32 (Ar-C), 109.61 (Ar-C), 103.71 (Ar-C), 98.23 (Ar-C), 44.65 (CH<sub>2</sub>), 12.88 (CH<sub>3</sub>).

### Synthesis of PuL<sub>2</sub>

H<sub>2</sub>L (25 mg, 0.050 mmol) and NEt<sub>3</sub> (200 μL, 1.43 mmol) in DCM (1 mL) were added to a solution of PuCl<sub>3</sub>•xH<sub>2</sub>O (10 mg, 0.029 mmol, based on elemental Pu content) in methanol (1 mL). The color of the solution immediately changed from light violet to black. Pentane (5 mL) was carefully layered on top of the solution and after 1 d at room temperature, X-ray quality crystals of PuL<sub>2</sub> were isolated as black block-like crystals, washed with pentane and dried in air. Due to radioactivity, elemental analysis was not obtained.

### Synthesis of CeL<sub>2</sub>

H<sub>2</sub>L (25 mg, 0.050 mmol) and NEt<sub>3</sub> (200 μL, 1.43 mmol) in DCM (1 mL) were added to a solution of CeCl<sub>3</sub>•7H<sub>2</sub>O (10 mg, 0.025 mmol) in methanol (1 mL). The color of the solution immediately changed from orange to black. Pentane (5 mL) was carefully layered on top of the solution and after 1 d at room temperature, X-ray quality crystals of CeL<sub>2</sub> were isolated as black block-like crystals, washed with pentane and dried in air (14 mg, 60%). <sup>1</sup>H NMR (CDCl<sub>3</sub>): δ 8.34 (s, 4H, *H*-C(Ar)=N), 7.04 (s, 12H, Ar-*H*), 5.99 (s, 4H, Ar-*H*), 5.40 (s, 4H, Ar-*H*), 3.26 (s, 16H, CH<sub>2</sub>CH<sub>3</sub>), 2.93 (s, 16H, CH<sub>2</sub>CH<sub>3</sub>), 1.24 (s, 24H, CH<sub>2</sub>CH<sub>3</sub>), 1.09 (s, 24H, CH<sub>2</sub>); <sup>13</sup>C{<sup>1</sup>H} NMR (CDCl<sub>3</sub>): δ 169.48 (Ar-C), 158.19 (Ar-C), 152.86 (Ar-C), 146.33 (Ar-C),

135.21 (Ar-C), 125.2 (Ar-C), 116.96 (Ar-C), 114.70 (Ar-C), 103.37 (Ar-C), 99.11 (Ar-C), 45.89 (CH<sub>2</sub>), 44.21 (CH<sub>2</sub>), 13.05 (CH<sub>3</sub>), 8.65 (CH<sub>3</sub>). Anal. Cal'd For C<sub>56</sub>H<sub>64</sub>CeN<sub>8</sub>O<sub>4</sub>·2CH<sub>2</sub>Cl<sub>2</sub>; C, 56.95; H, 5.60; N, 9.16. Found, C, 57.22; H, 5.78; N, 9.25. Melting point 250-255 °C.

## NMR Spectra

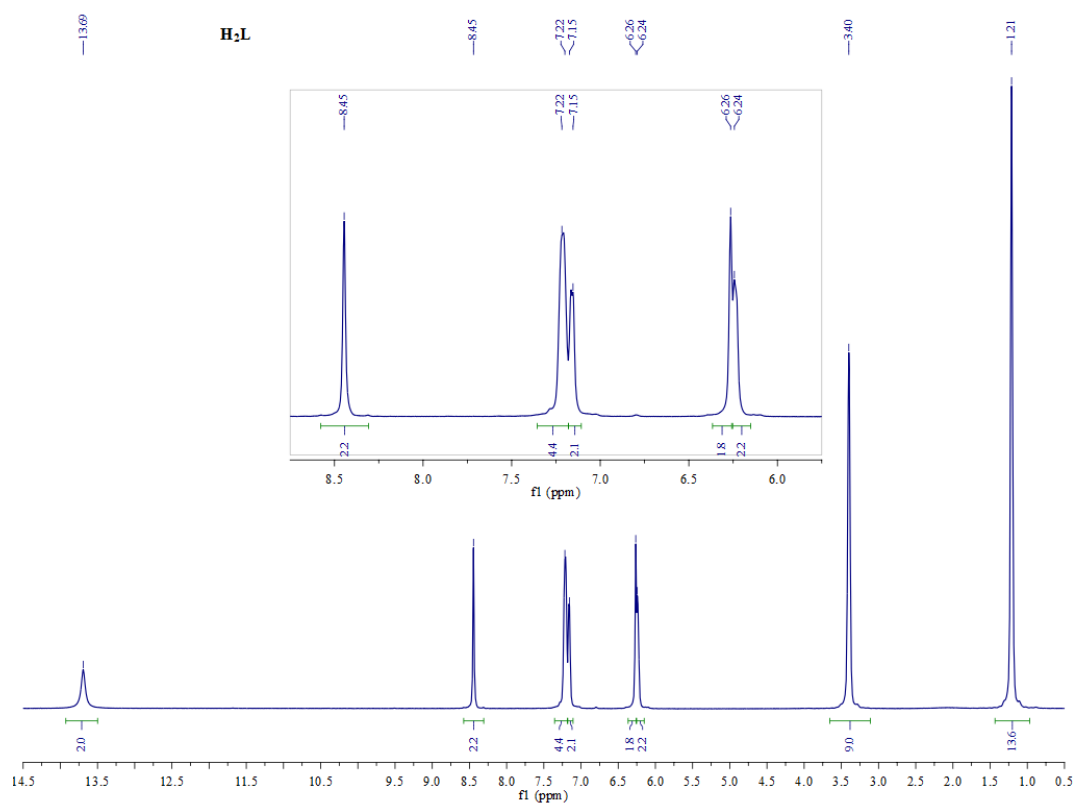

**Figure S1.**  $^1\text{H}$  NMR spectrum of  $\text{H}_2\text{L}$  in  $\text{CDCl}_3$  at 298 K.

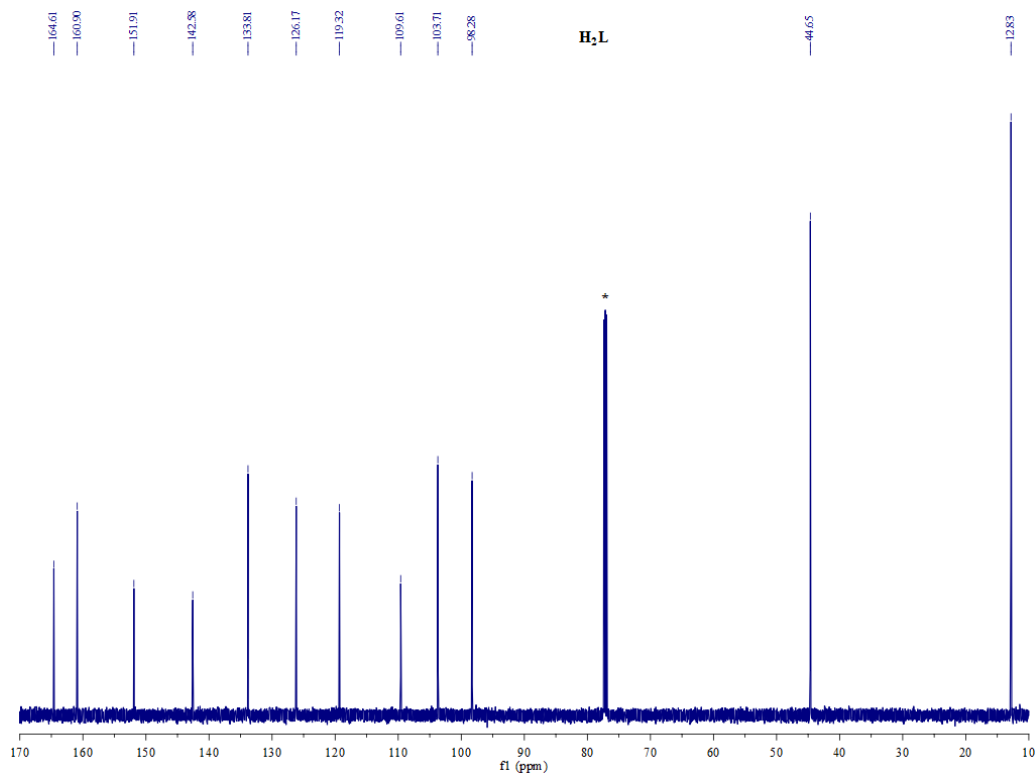

**Figure S2.**  $^{13}\text{C}\{^1\text{H}\}$  NMR spectrum of  $\text{H}_2\text{L}$  in  $\text{CDCl}_3$  at 298 K with \* denoting solvent resonance.

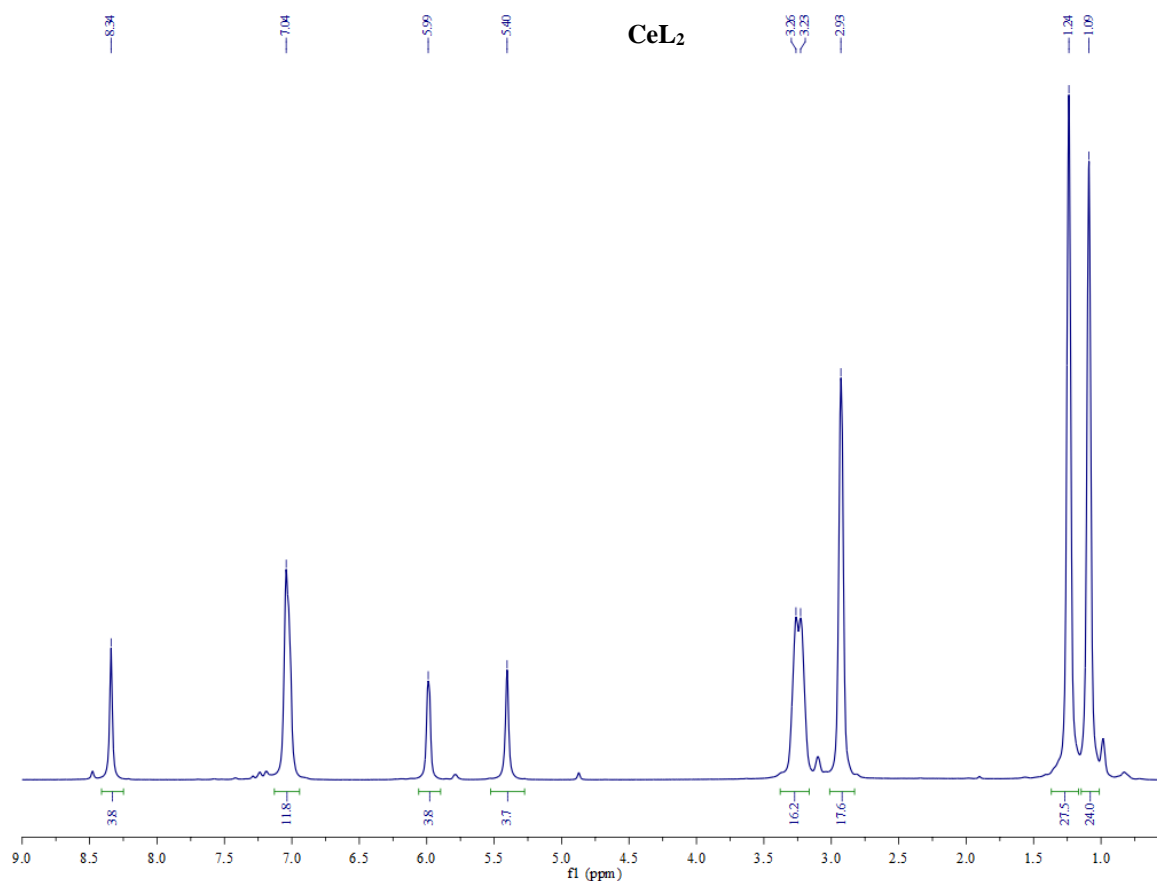

**Figure S3.**  $^1\text{H}$  NMR spectrum of  $\text{CeL}_2$  in  $\text{CDCl}_3$  at 298K.

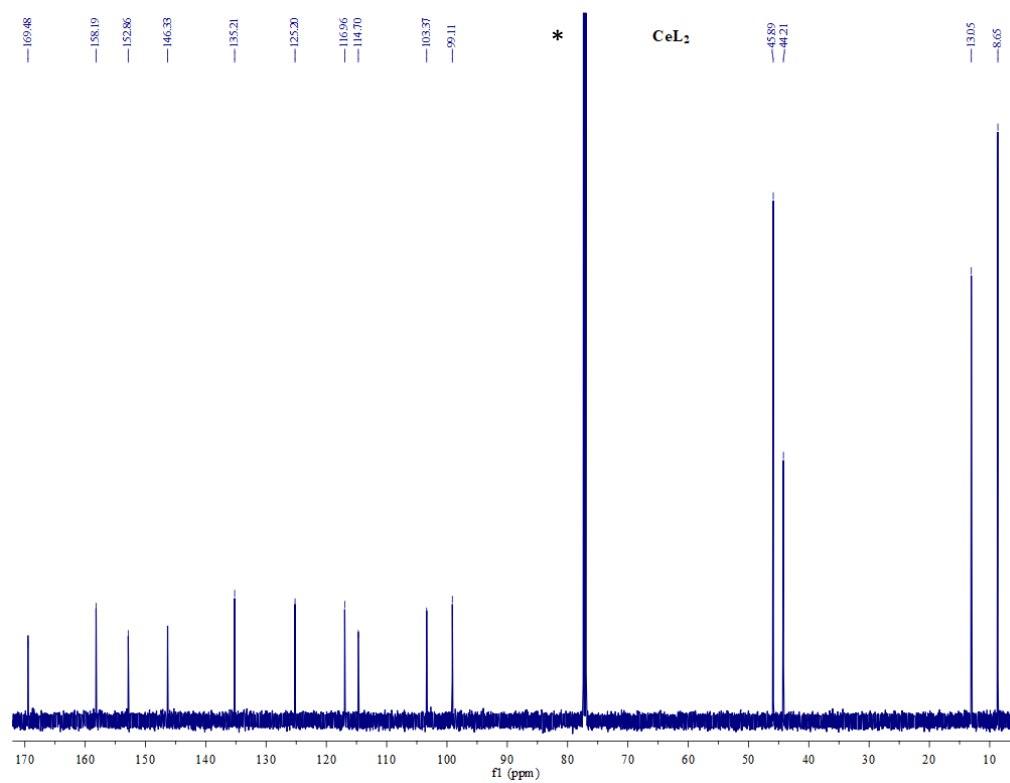

**Figure S4.**  $^{13}\text{C}\{^1\text{H}\}$  NMR spectrum of  $\text{CeL}_2$  in  $\text{CDCl}_3$  at 298K with \* denoting solvent resonance.

## Absorbance Spectra

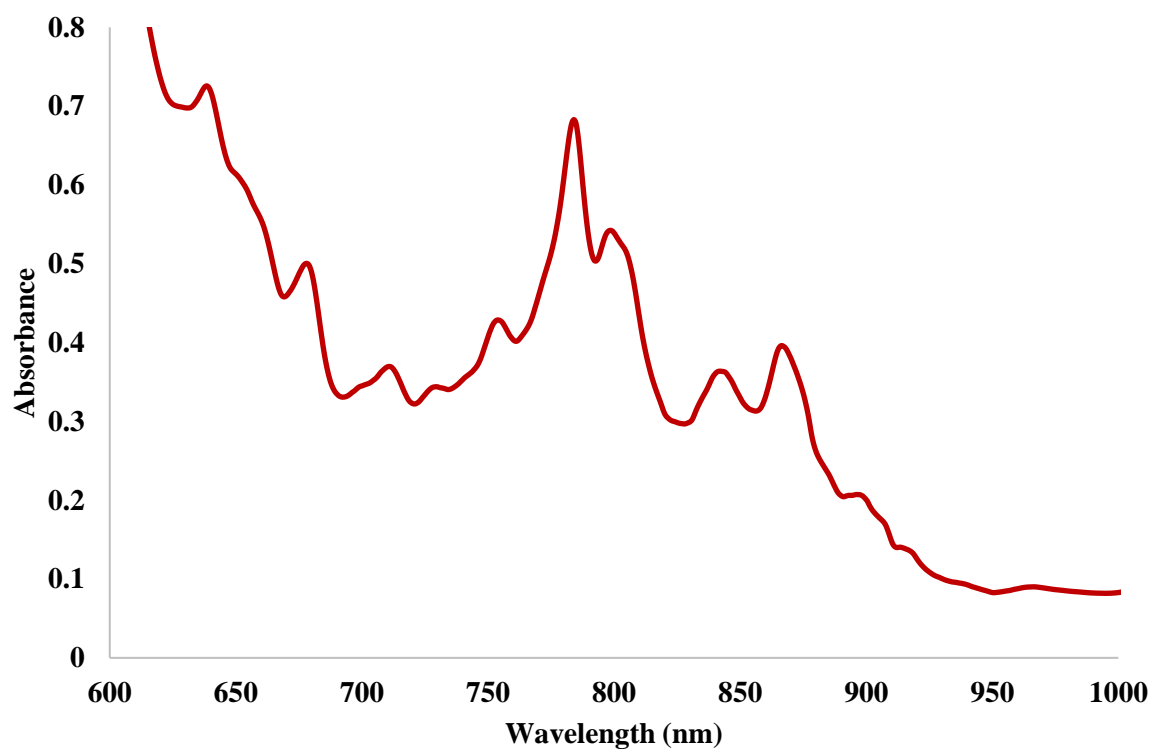

**Figure S5.** Absorption spectra of PuL<sub>2</sub> (L = *N,N'*-bis[(4,4'-diethylamino)salicylidene]-1,2-phenylenediamine).

## Cyclic Voltammetry

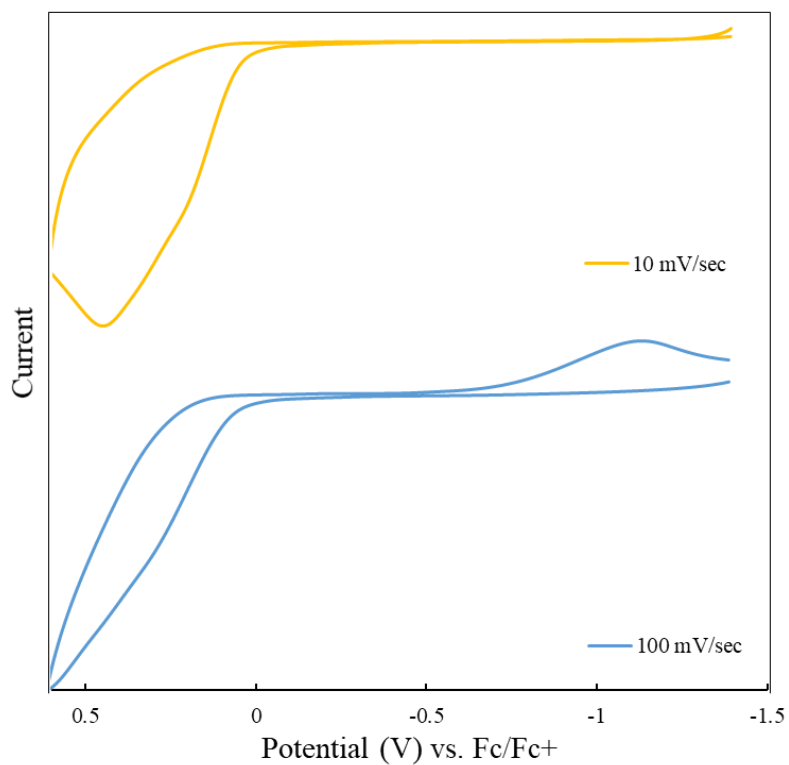

**Figure S6.** Cyclic voltammograms showing H<sub>2</sub>L at a concentration of  $5 \times 10^{-3}$  M and  $v = 10$  mV/sec and  $v = 100$  mV/sec. Both scans are taken at 298 K with 0.1 M [N<sup>n</sup>Bu<sub>4</sub>][PF<sub>6</sub>] in DCM.



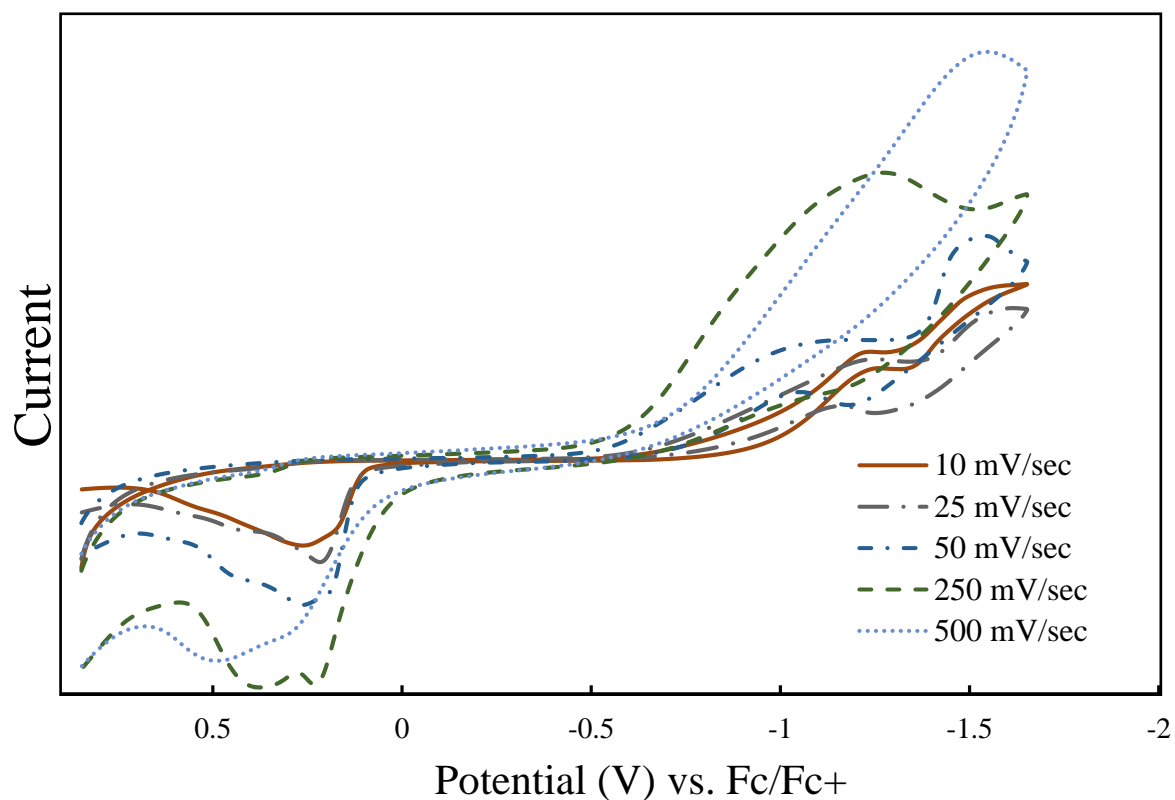

**Figure S7.** Cyclic voltammograms showing CeL<sub>2</sub> at a concentration of  $5 \times 10^{-3}$  M at various scan rates at 298 K with 0.1 M [N<sup>n</sup>Bu<sub>4</sub>][PF<sub>6</sub>] in DCM.

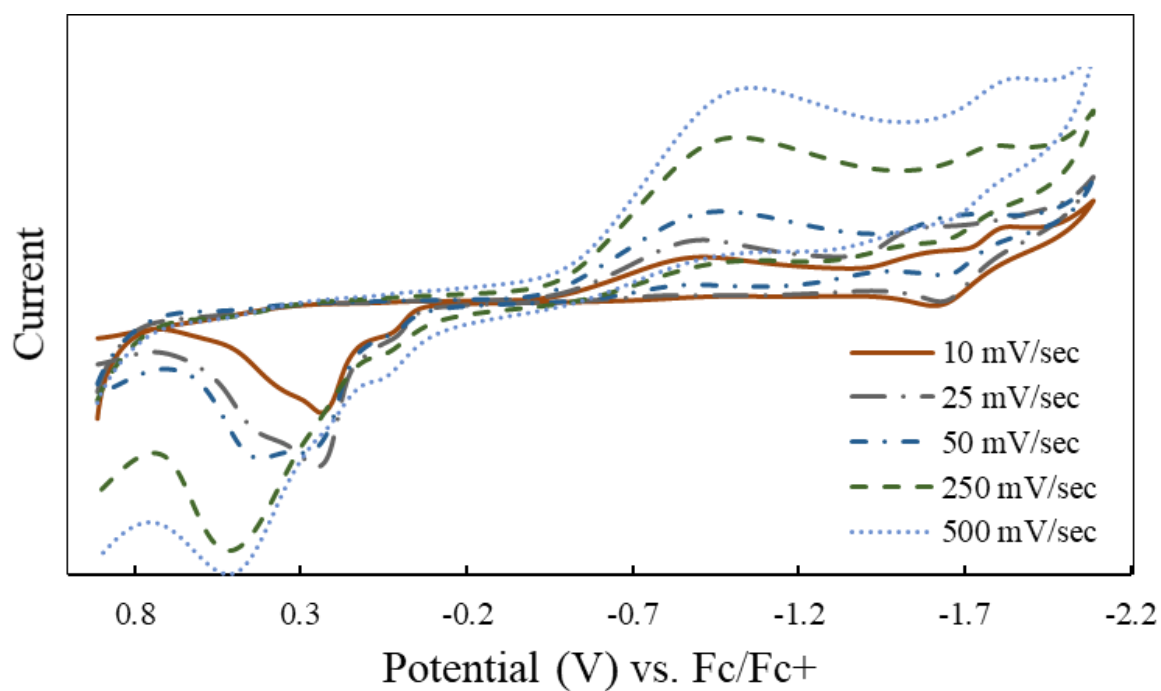

**Figure S8.** Cyclic voltammograms showing PuL<sub>2</sub> at a concentration of  $5 \times 10^{-3}$  M at various scan rates at 298 K with 0.1 M [N<sup>n</sup>Bu<sub>4</sub>][PF<sub>6</sub>] in DCM.

## Crystallographic Details

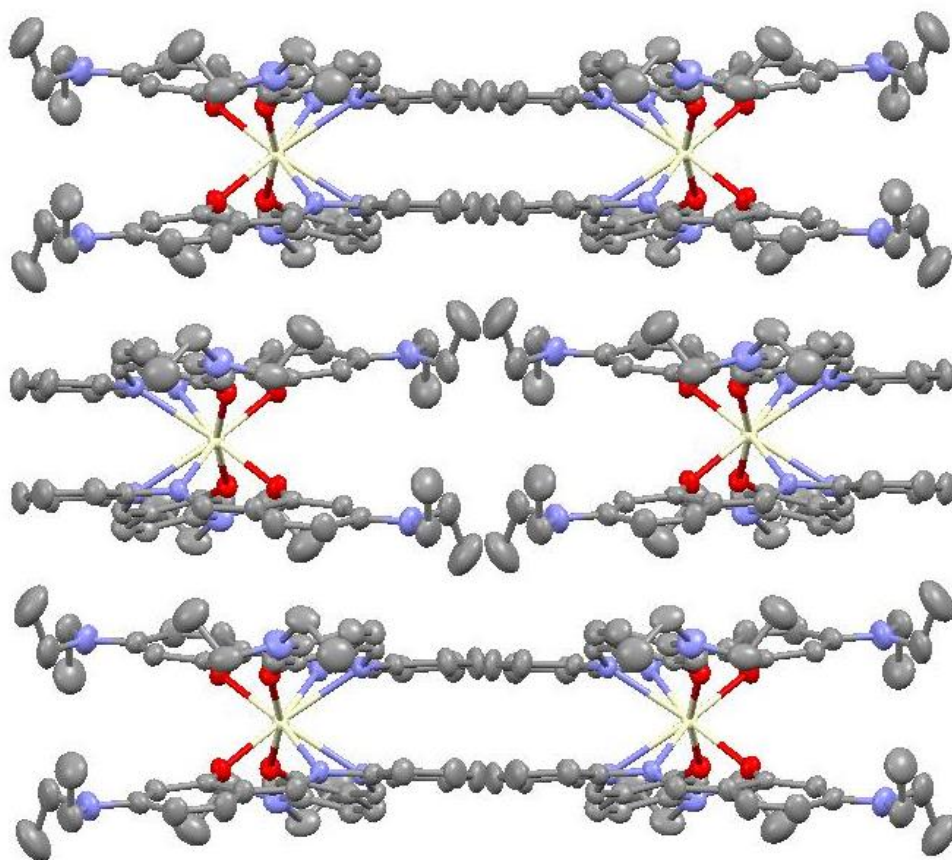

**Figure S9.** Packing diagram of CeL<sub>2</sub> shown down the c axis. Drawn at the 50% probability level with hydrogen atoms and lattice solvent omitted for clarity.

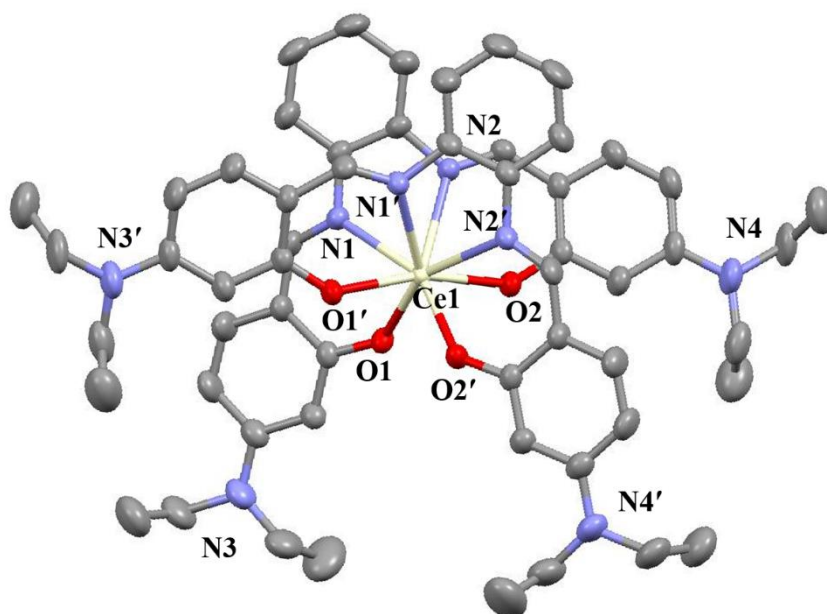

**Figure S10.** Molecular structure of CeL<sub>2</sub> drawn at the 50% probability level with hydrogen atoms and lattice solvent omitted for clarity.

**Table S1.** Crystallographic information for ML<sub>2</sub> (M = Ce, Pu)

| Compound                                                | CeL <sub>2</sub>                                                                 | PuL <sub>2</sub>                                                                 |
|---------------------------------------------------------|----------------------------------------------------------------------------------|----------------------------------------------------------------------------------|
| Empirical Formula                                       | C <sub>58</sub> H <sub>68</sub> Cl <sub>4</sub> N <sub>8</sub> O <sub>4</sub> Ce | C <sub>58</sub> H <sub>68</sub> Cl <sub>4</sub> N <sub>8</sub> O <sub>4</sub> Pu |
| Color                                                   | Black                                                                            | Red                                                                              |
| Habit                                                   | Block                                                                            | Irregular                                                                        |
| Temperature (K)                                         | 299(2)                                                                           | 298(2)                                                                           |
| Crystal System                                          | Monoclinic                                                                       | Monoclinic                                                                       |
| Space Group                                             | <i>C2/c</i>                                                                      | <i>C2/c</i>                                                                      |
| <i>a</i> (Å)                                            | 15.120(6)                                                                        | 15.0632(9)                                                                       |
| <i>b</i> (Å)                                            | 25.007(9)                                                                        | 24.9196(15)                                                                      |
| <i>c</i> (Å)                                            | 15.405(6)                                                                        | 15.3540(9)                                                                       |
| $\alpha$ (deg)                                          | 90                                                                               | 90                                                                               |
| $\beta$ (deg)                                           | 95.137(9)                                                                        | 95.012(2)                                                                        |
| $\gamma$ (deg)                                          | 90                                                                               | 90                                                                               |
| Volume (Å <sup>3</sup> )                                | 5801(4)                                                                          | 5741.4(6)                                                                        |
| Z                                                       | 4                                                                                | 4                                                                                |
| $\rho_{\text{calc}}$ (Mg/m <sup>3</sup> )               | 1.400                                                                            | 1.533                                                                            |
| $\mu$ (mm <sup>-1</sup> )                               | 1.021                                                                            | 1.387                                                                            |
| R1 <sup>a</sup> ( <i>I</i> > 2.0 $\sigma$ ( <i>I</i> )) | 0.0412                                                                           | 0.0491                                                                           |
| wR2 (all data)                                          | 0.0868                                                                           | 0.0906                                                                           |

<sup>a</sup>Definitions:  $R1 = \Sigma||F_o| - |F_c||/\Sigma|F_o|$ ,  $wR2 = [\Sigma w(F_o^2 - F_c^2)^2/\Sigma w(F_o^2)^2]^{1/2}$ .

Goof =  $S = [\Sigma[w(F_o^2 - F_c^2)^2] / (n-p)]^{1/2}$  where n is the number of reflections and p is the total number of parameters refined.

**Table S2.** Bond lengths [ $\text{\AA}$ ] and angles [ $^\circ$ ] for  $\text{PuL}_2$ .

|                     |            |                     |            |
|---------------------|------------|---------------------|------------|
| Pu(1)-O(2)#1        | 2.224(3)   | O(2)#1-Pu(1)-N(2)   | 152.05(10) |
| Pu(1)-O(2)          | 2.224(3)   | O(2)-Pu(1)-N(2)     | 71.76(10)  |
| Pu(1)-O(1)#1        | 2.225(3)   | O(1)#1-Pu(1)-N(2)   | 74.20(10)  |
| Pu(1)-O(1)          | 2.225(3)   | O(1)-Pu(1)-N(2)     | 112.80(11) |
| Pu(1)-N(2)#1        | 2.538(3)   | N(2)#1-Pu(1)-N(2)   | 133.38(14) |
| Pu(1)-N(2)          | 2.538(3)   | O(2)#1-Pu(1)-N(1)#1 | 110.89(10) |
| Pu(1)-N(1)#1        | 2.572(3)   | O(2)-Pu(1)-N(1)#1   | 145.97(10) |
| Pu(1)-N(1)          | 2.572(3)   | O(1)#1-Pu(1)-N(1)#1 | 71.11(10)  |
|                     |            | O(1)-Pu(1)-N(1)#1   | 124.27(10) |
| O(2)#1-Pu(1)-O(2)   | 87.75(14)  | N(2)#1-Pu(1)-N(1)#1 | 61.57(10)  |
| O(2)#1-Pu(1)-O(1)#1 | 84.87(10)  | N(2)-Pu(1)-N(1)#1   | 79.95(10)  |
| O(2)-Pu(1)-O(1)#1   | 83.08(10)  | O(2)#1-Pu(1)-N(1)   | 145.98(10) |
| O(2)#1-Pu(1)-O(1)   | 83.09(10)  | O(2)-Pu(1)-N(1)     | 110.89(10) |
| O(2)-Pu(1)-O(1)     | 84.87(10)  | O(1)#1-Pu(1)-N(1)   | 124.27(10) |
| O(1)#1-Pu(1)-O(1)   | 163.27(14) | O(1)-Pu(1)-N(1)     | 71.11(10)  |
| O(2)#1-Pu(1)-N(2)#1 | 71.77(10)  | N(2)#1-Pu(1)-N(1)   | 79.95(10)  |
| O(2)-Pu(1)-N(2)#1   | 152.05(10) | N(2)-Pu(1)-N(1)     | 61.57(10)  |
| O(1)#1-Pu(1)-N(2)#1 | 112.80(11) | N(1)#1-Pu(1)-N(1)   | 69.39(14)  |
| O(1)-Pu(1)-N(2)#1   | 74.19(10)  |                     |            |

**Table S2.** Bond lengths [ $\text{\AA}$ ] and angles [ $^\circ$ ] for  $\text{CeL}_2$ .

|                   |            |                     |           |
|-------------------|------------|---------------------|-----------|
| Ce(1)-O(2)#1      | 2.2376(16) | O(2)#1-Ce(1)-O(1)#1 | 85.82(6)  |
| Ce(1)-O(2)        | 2.2376(16) | O(2)-Ce(1)-O(1)#1   | 83.62(6)  |
| Ce(1)-O(1)#1      | 2.2418(15) | O(2)#1-Ce(1)-O(1)   | 83.62(6)  |
| Ce(1)-O(1)        | 2.2418(15) | O(2)-Ce(1)-O(1)     | 85.82(6)  |
| Ce(1)-N(2)#1      | 2.6031(18) | O(1)#1-Ce(1)-O(1)   | 88.79(8)  |
| Ce(1)-N(2)        | 2.6031(18) | O(2)#1-Ce(1)-N(2)#1 | 70.54(6)  |
| Ce(1)-N(1)#1      | 2.5760(19) | O(2)-Ce(1)-N(2)#1   | 123.03(5) |
| Ce(1)-N(1)        | 2.5760(19) | O(1)#1-Ce(1)-N(2)#1 | 110.36(6) |
|                   |            | O(1)-Ce(1)-N(2)#1   | 145.93(6) |
| O(2)#1-Ce(1)-O(2) | 165.21(7)  | O(2)#1-Ce(1)-N(2)   | 123.03(5) |

|                      |           |                    |           |
|----------------------|-----------|--------------------|-----------|
| O(2)-Ce(1)-N(2)      | 70.54(5)  | N(2)-Ce(1)-N(1)#1  | 80.38(6)  |
| O(1)#1-Ce(1)-N(2)    | 145.93(6) | O(2)#1-Ce(1)-N(1)  | 73.88(6)  |
| O(1)-Ce(1)-N(2)      | 110.36(6) | O(2)-Ce(1)-N(1)    | 112.29(6) |
| N(2)#1-Ce(1)-N(2)    | 69.22(8)  | O(1)#1-Ce (1)-N(1) | 152.61(6) |
| O(2)#1-Ce (1)-N(1)#1 | 112.29(6) | O(1)-Ce(1)-N(1)    | 71.14(6)  |
| O(2)-Ce(1)-N(1)#1    | 73.88(6)  | N(2)#1-Ce(1)-N(1)  | 80.38(6)  |
| O(1)#1-Ce(1)-N(1)#1  | 71.14(6)  | N(2)-Ce(1)-N(1)    | 61.09(6)  |
| O(1)-Ce(1)-N(1)#1    | 152.62(6) | N(1)#1-Ce(1)-N(1)  | 133.45(8) |
| N(2)#1-Ce(1)-N(1)#1  | 61.09(6)  |                    |           |

## References

1. APEX3 Version 2017.3-0, Bruker AXS, Inc.; Madison, WI 2017
2. Sheldrick, G. M. SADABS, Version 2012/1, Bruker AXS, Inc.; Madison, WI 2012
3. SAINT Version 8.30, Bruker AXS, Inc.; Madison, WI 2012
4. OLEX2 Version 1.2.10, OlexSys Ltd. 2004-2018
5. W. Wu, J. Sun, S. Ji, W. Wu, J. Zhao and H. Guo, *Dalton Trans.*, 2011, **40**, 11550-11561.
6. J. A. Castro-Osma, M. North and X. Wu, *Chem. Eur. J.*, 2016, **22**, 2100-2107.
7. P. Wu, D. L. Ma, C. H. Leung, S. C. Yan, N. Zhu, R. Abagyan and C. M. Che, *Chem. Eur. J.*, 2009, **15**, 13008-13021.
8. J. Cheng, K. Wei, X. Ma, X. Zhou and H. Xiang, *J. Phys. Chem. C*, 2013, **117**, 16552-16563.
9. T. Yu, K. Zhang, Y. Zhao, C. Yang, H. Zhang, L. Qian, D. Fan, W. Dong, L. Chen and Y. Qiu, *Inorg. Chim. Acta*, 2008, **361**, 233-240.
